# Supplementary material
Source: publisher figshare collection journal article supplement (https://acs.figshare.com/ndownloader/files/4631425)
Supplement: Supplementary file 1 [file 4631425]

## Supporting Information

# A parallel array of Pt/Polyoxometalates composite nanotubes with stepwise inside diameter control and its application in catalysis

Zhuo Ma, Qiang Liu, Zhi-Min Cui and Wei-Guo Song\*

Beijing National Laboratory of Molecular Sciences (BNLMS), Institute of Chemistry,  
the Chinese Academy of Sciences Beijing 100080, P. R. China

\* Corresponding Author: Wei-Guo Song, Phone & Fax: (86)10-62557908.

Email: [wsong@iccas.ac.cn](mailto:wsong@iccas.ac.cn)

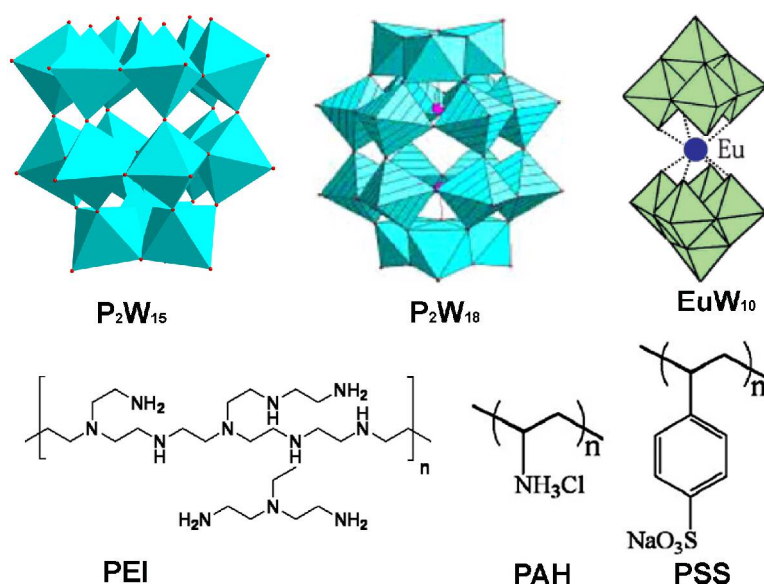

**Figure S1.** All structures of the referring compounds.

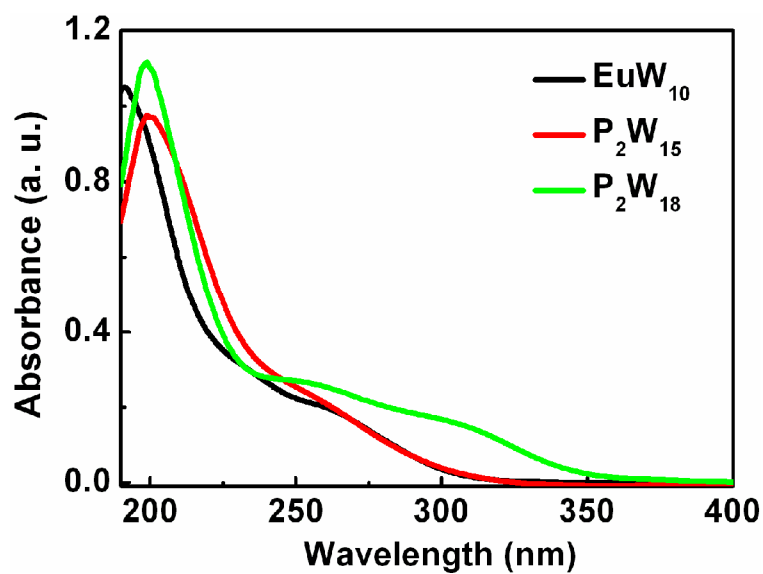

**Figure S2.** UV-vis spectra of the as-prepared compositions:  $\alpha\text{-K}_6\text{P}_2\text{W}_{18}\text{O}_{62}$  ( $\text{P}_2\text{W}_{18}$ ),

$\text{Na}_{12}\text{P}_2\text{W}_{15}\text{O}_{56} \cdot 18\text{H}_2\text{O}$  ( $\text{P}_2\text{W}_{15}$ ) and  $\text{Na}_9\text{EuW}_{10}\text{O}_{36} \cdot 32\text{H}_2\text{O}$  ( $\text{EuW}_{10}$ )

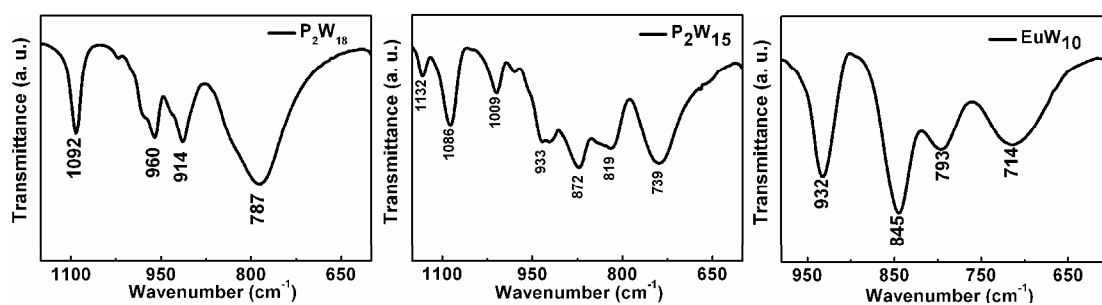

**Figure S3.** IR spectra of the as-prepared compositions:  $\alpha\text{-K}_6\text{P}_2\text{W}_{18}\text{O}_{62}$  ( $\text{P}_2\text{W}_{18}$ ),

$\text{Na}_{12}\text{P}_2\text{W}_{15}\text{O}_{56} \cdot 18\text{H}_2\text{O}$  ( $\text{P}_2\text{W}_{15}$ ) and  $\text{Na}_9\text{EuW}_{10}\text{O}_{36} \cdot 32\text{H}_2\text{O}$  ( $\text{EuW}_{10}$ ).

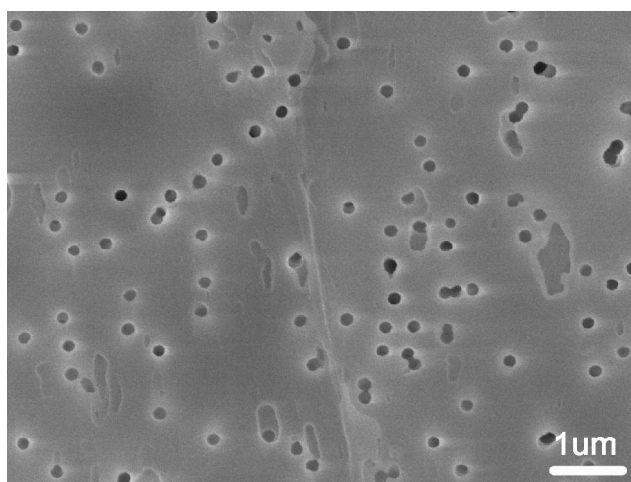

**Figure S4.** SEM images of PC membranes with an average pore diameter of about 200 nm

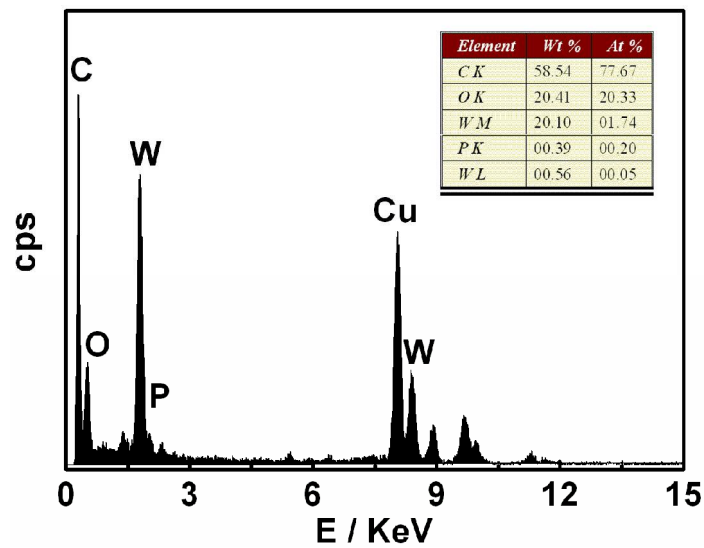

**Figure S5.** The EDX spectrum of the  $(P_2W_{18}/PAH)_{15}$  tubes

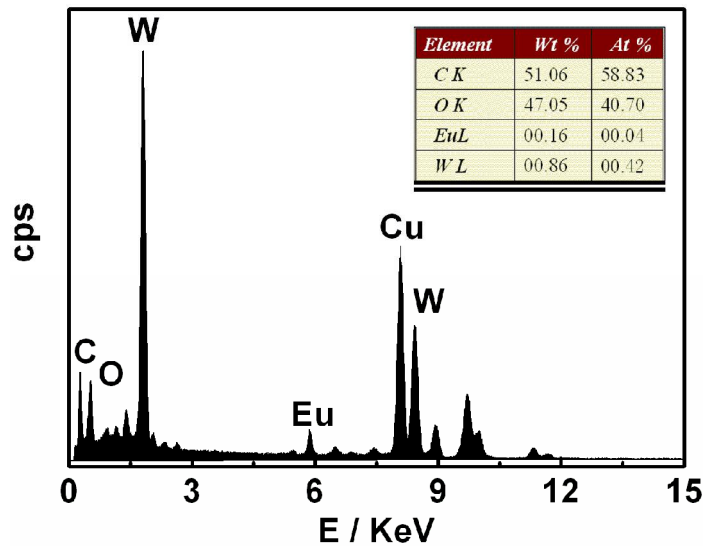

**Figure S6.** The EDX spectrum of the  $(EuW_{10}/PAH)_{15}$  tubes

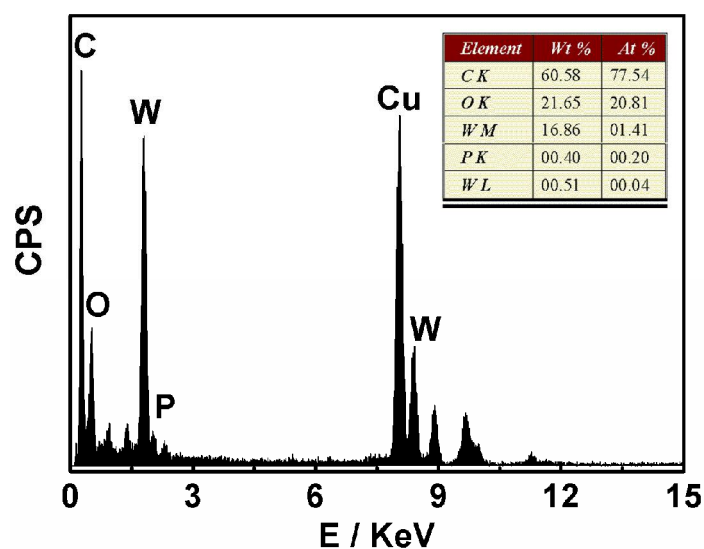

**Figure S7.** The EDX spectrum of the  $(P_2W_{15}/PDDA)_{15}$  tubes

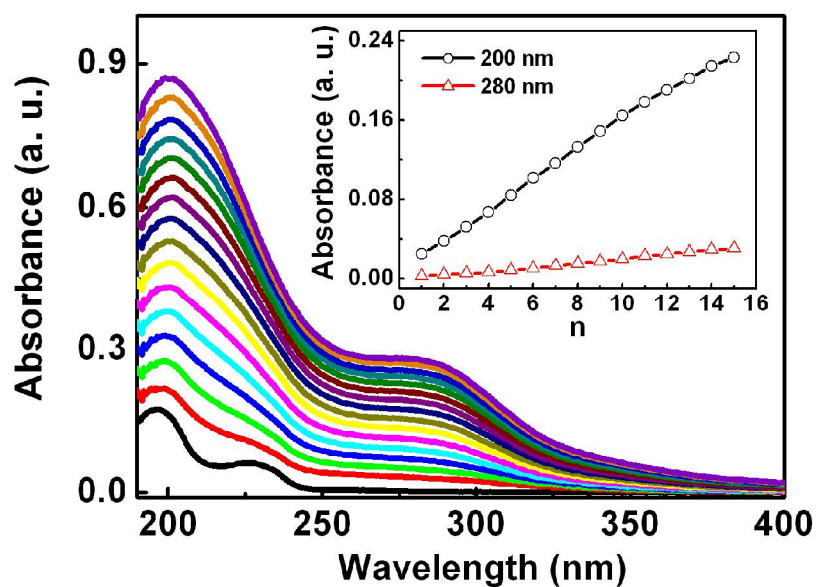

**Figure S8.** UV-vis spectra of  $(P_2W_{18}/PAH)_n$  with  $n = 0-15$ . The inset shows the absorbance at 200 and 280 nm as a function of  $n$ .

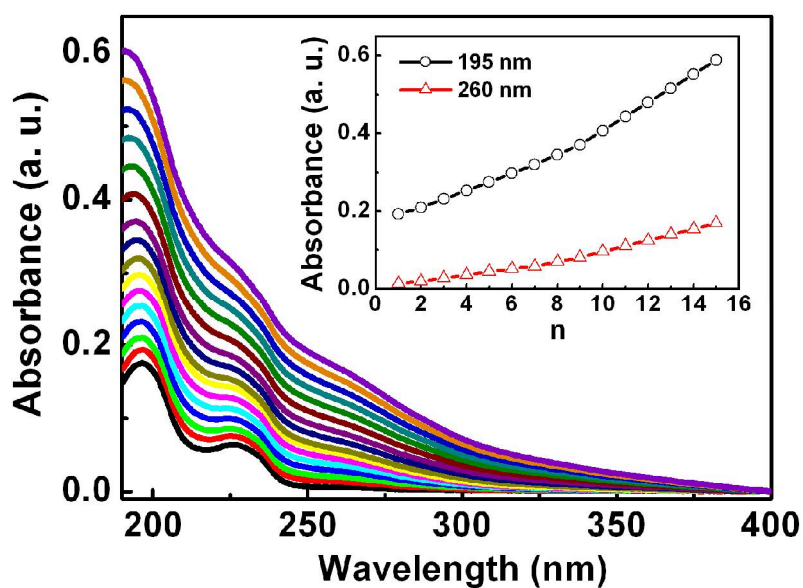

**Figure S9.** UV-vis spectra of  $(\text{EuW}_{10}/\text{PAH})_n$  with  $n = 0-15$ . The inset shows the absorbance at 195 and 260 nm as a function of  $n$ .

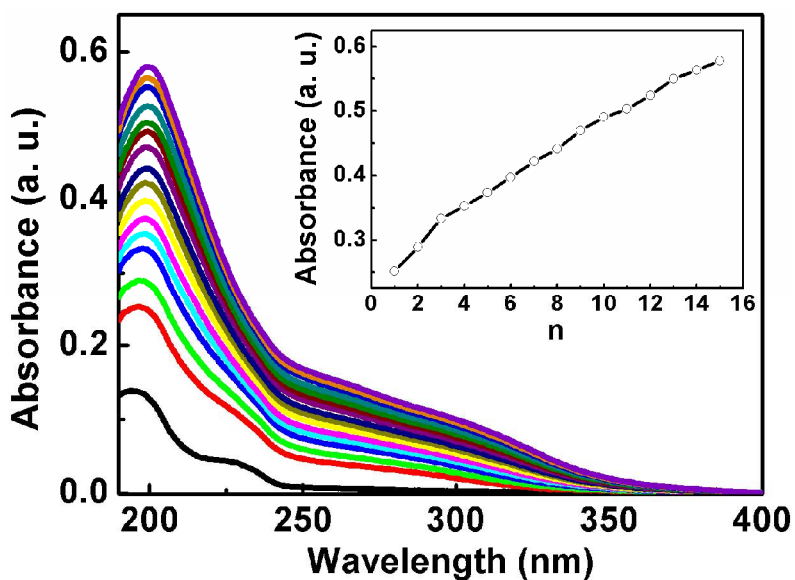

**Figure S10.** UV-vis spectra of  $(\text{P}_2\text{W}_{15}/\text{PDDA})_n$  with  $n = 0-15$ . The inset shows the absorbance at 198 nm as a function of  $n$ .

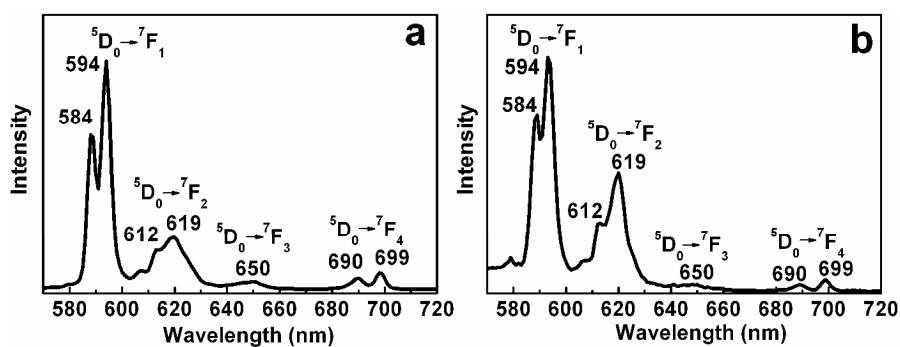

**Figure S11.** Photoluminescence spectra of  $\text{EuW}_{10}$  powder (a) and  $(\text{EuW}_{10}/\text{PAH})_n$  nanotubes in solution (b) acquired at 298 K ( $\lambda_{\text{ex}} = 260$  nm).

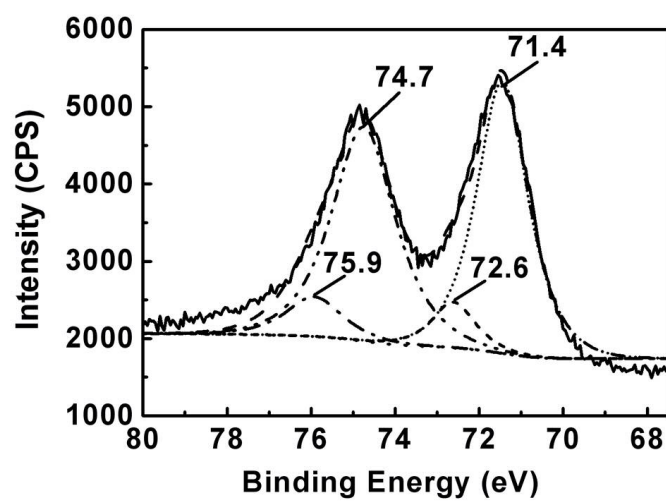

**Figure S12.** XPS spectrum of Pt4f peak of Pt/POM nanotubes composites
